# Supplementary material for: Insights for disease modeling from single-cell transcriptomics of iPSC-derived Ngn2-induced neurons and astrocytes across differentiation time and co-culture
Source: PubMed Central journal article supplement (PMC10985965; doi:10.1186/s12915-024-01867-4), 2024-04-02
Supplement: 12915_2024_1867_MOESM9_ESM.pdf [file 12915_2024_1867_MOESM9_ESM.pdf]

|                                                           |              | N-I  | N-II   | N-III  | N-IV   | N-V    |
|-----------------------------------------------------------|--------------|------|--------|--------|--------|--------|
| cell-cell adhesion                                        | (GO:0098609) | Blue | Blue   | Blue   | Blue   | Yellow |
| nervous system development                                | (GO:0007399) | Blue | Blue   | Blue   | Yellow | Blue   |
| anatomical structure morphogenesis                        | (GO:0009653) | Blue | Blue   | Blue   | Yellow | Blue   |
| neurogenesis                                              | (GO:0022008) | Blue | Blue   | Blue   | Yellow | Blue   |
| cell differentiation                                      | (GO:0030154) | Blue | Blue   | Blue   | Yellow | Blue   |
| neuron differentiation                                    | (GO:0030182) | Blue | Blue   | Blue   | Yellow | Blue   |
| cell development                                          | (GO:0048468) | Blue | Blue   | Blue   | Yellow | Blue   |
| generation of neurons                                     | (GO:0048699) | Blue | Blue   | Blue   | Yellow | Blue   |
| system development                                        | (GO:0048731) | Blue | Blue   | Blue   | Yellow | Blue   |
| cellular developmental process                            | (GO:0048869) | Blue | Blue   | Blue   | Yellow | Blue   |
| synaptic signaling                                        | (GO:0099536) | Blue | Blue   | Blue   | Yellow | Blue   |
| trans-synaptic signaling                                  | (GO:0099537) | Blue | Blue   | Blue   | Yellow | Blue   |
| multicellular organism development                        | (GO:0007275) | Blue | Blue   | Blue   | Yellow | Yellow |
| multicellular organismal process                          | (GO:0032501) | Blue | Blue   | Blue   | Yellow | Yellow |
| developmental process                                     | (GO:0032502) | Blue | Blue   | Blue   | Yellow | Yellow |
| chemical synaptic transmission                            | (GO:0007268) | Blue | Blue   | Blue   | Yellow | White  |
| anterograde trans-synaptic signaling                      | (GO:0098916) | Blue | Blue   | Blue   | Yellow | White  |
| cell morphogenesis                                        | (GO:0000902) | Blue | Blue   | Yellow | Yellow | Blue   |
| neuron projection development                             | (GO:0031175) | Blue | Blue   | Yellow | Yellow | Blue   |
| cellular component morphogenesis                          | (GO:0032989) | Blue | Blue   | Yellow | Yellow | Blue   |
| cell part morphogenesis                                   | (GO:0032990) | Blue | Blue   | Yellow | Yellow | Blue   |
| neuron development                                        | (GO:0048666) | Blue | Blue   | Yellow | Yellow | Blue   |
| neuron projection morphogenesis                           | (GO:0048812) | Blue | Blue   | Yellow | Yellow | Blue   |
| cell projection morphogenesis                             | (GO:0048858) | Blue | Blue   | Yellow | Yellow | Blue   |
| plasma membrane bounded cell projection morphogenesis     | (GO:0120039) | Blue | Blue   | Yellow | Yellow | Blue   |
| anatomical structure development                          | (GO:0048856) | Blue | Blue   | Yellow | Yellow | Yellow |
| cell morphogenesis involved in differentiation            | (GO:0000904) | Blue | Blue   | Yellow | Yellow | White  |
| chemotaxis                                                | (GO:0006935) | Blue | Blue   | Yellow | Yellow | White  |
| axonogenesis                                              | (GO:0007409) | Blue | Blue   | Yellow | Yellow | White  |
| axon guidance                                             | (GO:0007411) | Blue | Blue   | Yellow | Yellow | White  |
| locomotion                                                | (GO:0040011) | Blue | Blue   | Yellow | Yellow | White  |
| taxis                                                     | (GO:0042330) | Blue | Blue   | Yellow | Yellow | White  |
| cell morphogenesis involved in neuron differentiation     | (GO:0048667) | Blue | Blue   | Yellow | Yellow | White  |
| axon development                                          | (GO:0061564) | Blue | Blue   | Yellow | Yellow | White  |
| neuron projection guidance                                | (GO:0097485) | Blue | Blue   | Yellow | Yellow | White  |
| modulation of chemical synaptic transmission              | (GO:0050804) | Blue | Blue   | White  | Blue   | Blue   |
| regulation of trans-synaptic signaling                    | (GO:0099177) | Blue | Blue   | White  | Blue   | Blue   |
| cell-cell adhesion via plasma-membrane adhesion molecules | (GO:0098742) | Blue | Blue   | White  | Blue   | Yellow |
| regulation of cellular process                            | (GO:0050794) | Blue | Blue   | White  | White  | Blue   |
| cell adhesion                                             | (GO:0007155) | Blue | Blue   | White  | White  | Yellow |
| regulation of neuron projection development               | (GO:0010975) | Blue | Blue   | White  | White  | White  |
| response to chemical                                      | (GO:0042221) | Blue | Blue   | White  | White  | White  |
| regulation of axonogenesis                                | (GO:0050770) | Blue | Blue   | White  | White  | White  |
| cell-cell signaling                                       | (GO:0007267) | Blue | Blue   | White  | Red    | White  |
| response to external stimulus                             | (GO:0009605) | Blue | Blue   | White  | Red    | White  |
| cell projection organization                              | (GO:0030030) | Blue | Blue   | White  | Red    | White  |
| biological regulation                                     | (GO:0065007) | Blue | Blue   | White  | Red    | White  |
| plasma membrane bounded cell projection organization      | (GO:0120036) | Blue | Blue   | White  | Red    | White  |
| cell communication                                        | (GO:0007154) | Blue | Yellow | White  | Red    | White  |
| signaling                                                 | (GO:0023052) | Blue | Yellow | White  | Red    | White  |

|                                                                             |              |   |   |   |   |
|-----------------------------------------------------------------------------|--------------|---|---|---|---|
| cellular process                                                            | (GO:0009987) | ■ | ■ | ■ | ■ |
| cellular component organization or biogenesis                               | (GO:0071840) | ■ | ■ | ■ | ■ |
| cell junction organization                                                  | (GO:0034330) | ■ | ■ | ■ | ■ |
| translation                                                                 | (GO:0006412) | ■ | ■ | ■ | ■ |
| peptide metabolic process                                                   | (GO:0006518) | ■ | ■ | ■ | ■ |
| peptide biosynthetic process                                                | (GO:0043043) | ■ | ■ | ■ | ■ |
| amide biosynthetic process                                                  | (GO:0043604) | ■ | ■ | ■ | ■ |
| regulation of sodium ion transport                                          | (GO:0002028) | ■ | ■ | ■ | ■ |
| biological_process                                                          | (GO:0008150) | ■ | ■ | ■ | ■ |
| ribonucleoprotein complex biogenesis                                        | (GO:0022613) | ■ | ■ | ■ | ■ |
| ribosome biogenesis                                                         | (GO:0042254) | ■ | ■ | ■ | ■ |
| vesicle-mediated transport in synapse                                       | (GO:0099003) | ■ | ■ | ■ | ■ |
| synaptic vesicle cycle                                                      | (GO:0099504) | ■ | ■ | ■ | ■ |
| synaptic transmission, glutamatergic                                        | (GO:0035249) | ■ | ■ | ■ | ■ |
| central nervous system development                                          | (GO:0007417) | ■ | ■ | ■ | ■ |
| protein-RNA complex assembly                                                | (GO:0022618) | ■ | ■ | ■ | ■ |
| regulation of RNA splicing                                                  | (GO:0043484) | ■ | ■ | ■ | ■ |
| regulation of mRNA splicing, via spliceosome                                | (GO:0048024) | ■ | ■ | ■ | ■ |
| regulation of mRNA processing                                               | (GO:0050684) | ■ | ■ | ■ | ■ |
| maintenance of location in cell                                             | (GO:0051651) | ■ | ■ | ■ | ■ |
| adherens junction organization                                              | (GO:0034332) | ■ | ■ | ■ | ■ |
| regulation of transport                                                     | (GO:0051049) | ■ | ■ | ■ | ■ |
| cytoplasmic translation                                                     | (GO:0002181) | ■ | ■ | ■ | ■ |
| regulation of anatomical structure morphogenesis                            | (GO:0022603) | ■ | ■ | ■ | ■ |
| monoatomic ion transmembrane transport                                      | (GO:0034220) | ■ | ■ | ■ | ■ |
| synaptic vesicle recycling                                                  | (GO:0036465) | ■ | ■ | ■ | ■ |
| ribosomal large subunit biogenesis                                          | (GO:0042273) | ■ | ■ | ■ | ■ |
| ribosomal small subunit biogenesis                                          | (GO:0042274) | ■ | ■ | ■ | ■ |
| regulation of cell differentiation                                          | (GO:0045595) | ■ | ■ | ■ | ■ |
| synaptic vesicle endocytosis                                                | (GO:0048488) | ■ | ■ | ■ | ■ |
| animal organ development                                                    | (GO:0048513) | ■ | ■ | ■ | ■ |
| regulation of neurogenesis                                                  | (GO:0050767) | ■ | ■ | ■ | ■ |
| regulation of developmental process                                         | (GO:0050793) | ■ | ■ | ■ | ■ |
| regulation of nervous system development                                    | (GO:0051960) | ■ | ■ | ■ | ■ |
| regulation of biological quality                                            | (GO:0065008) | ■ | ■ | ■ | ■ |
| protein-RNA complex organization                                            | (GO:0071826) | ■ | ■ | ■ | ■ |
| regulation of biological process                                            | (GO:0050789) | ■ | ■ | ■ | ■ |
| calcium-ion regulated exocytosis                                            | (GO:0017156) | ■ | ■ | ■ | ■ |
| regulation of cell migration                                                | (GO:0030334) | ■ | ■ | ■ | ■ |
| cell junction assembly                                                      | (GO:0034329) | ■ | ■ | ■ | ■ |
| heterophilic cell-cell adhesion via plasma membrane cell adhesion molecules | (GO:0007157) | ■ | ■ | ■ | ■ |
| regulation of cell projection organization                                  | (GO:0031344) | ■ | ■ | ■ | ■ |
| receptor clustering                                                         | (GO:0043113) | ■ | ■ | ■ | ■ |
| response to stimulus                                                        | (GO:0050896) | ■ | ■ | ■ | ■ |
| regulation of plasma membrane bounded cell projection organization          | (GO:0120035) | ■ | ■ | ■ | ■ |
| signal transduction                                                         | (GO:0007165) | ■ | ■ | ■ | ■ |
| biosynthetic process                                                        | (GO:0009058) | ■ | ■ | ■ | ■ |
| macromolecule biosynthetic process                                          | (GO:0009059) | ■ | ■ | ■ | ■ |
| cellular biosynthetic process                                               | (GO:0044249) | ■ | ■ | ■ | ■ |
| cellular nitrogen compound biosynthetic process                             | (GO:0044271) | ■ | ■ | ■ | ■ |
| synapse organization                                                        | (GO:0050808) | ■ | ■ | ■ | ■ |

|                                                             |              |  |  |  |  |  |
|-------------------------------------------------------------|--------------|--|--|--|--|--|
| organonitrogen compound biosynthetic process                | (GO:1901566) |  |  |  |  |  |
| organic substance biosynthetic process                      | (GO:1901576) |  |  |  |  |  |
| regulation of metal ion transport                           | (GO:0010959) |  |  |  |  |  |
| neurotransmitter transport                                  | (GO:0006836) |  |  |  |  |  |
| response to oxidative stress                                | (GO:0006979) |  |  |  |  |  |
| neurotransmitter secretion                                  | (GO:0007269) |  |  |  |  |  |
| gene expression                                             | (GO:0010467) |  |  |  |  |  |
| synaptic vesicle exocytosis                                 | (GO:0016079) |  |  |  |  |  |
| signal release                                              | (GO:0023061) |  |  |  |  |  |
| mitochondrial respiratory chain complex I assembly          | (GO:0032981) |  |  |  |  |  |
| amide metabolic process                                     | (GO:0043603) |  |  |  |  |  |
| regulated exocytosis                                        | (GO:0045055) |  |  |  |  |  |
| signal release from synapse                                 | (GO:0099643) |  |  |  |  |  |
| carbohydrate derivative biosynthetic process                | (GO:1901137) |  |  |  |  |  |
| organonitrogen compound metabolic process                   | (GO:1901564) |  |  |  |  |  |
| negative regulation of protein phosphorylation              | (GO:0001933) |  |  |  |  |  |
| cellular component organization                             | (GO:0016043) |  |  |  |  |  |
| negative regulation of phosphorylation                      | (GO:0042326) |  |  |  |  |  |
| negative regulation of phosphorus metabolic process         | (GO:0010563) |  |  |  |  |  |
| negative regulation of protein modification process         | (GO:0031400) |  |  |  |  |  |
| negative regulation of phosphate metabolic process          | (GO:0045936) |  |  |  |  |  |
| regulation of alternative mRNA splicing, via spliceosome    | (GO:0000381) |  |  |  |  |  |
| translational elongation                                    | (GO:0006414) |  |  |  |  |  |
| regulation of exocytosis                                    | (GO:0017157) |  |  |  |  |  |
| regulation of localization                                  | (GO:0032879) |  |  |  |  |  |
| regulation of transmembrane transport                       | (GO:0034762) |  |  |  |  |  |
| regulation of monoatomic ion transmembrane transport        | (GO:0034765) |  |  |  |  |  |
| regulation of monoatomic ion transport                      | (GO:0043269) |  |  |  |  |  |
| maintenance of location                                     | (GO:0051235) |  |  |  |  |  |
| import into cell                                            | (GO:0098657) |  |  |  |  |  |
| regulation of monoatomic cation transmembrane transport     | (GO:1904062) |  |  |  |  |  |
| regulation of sodium ion transmembrane transporter activity | (GO:2000649) |  |  |  |  |  |
| cell-cell junction assembly                                 | (GO:0007043) |  |  |  |  |  |
| regulation of cell growth                                   | (GO:0001558) |  |  |  |  |  |
| intermediate filament-based process                         | (GO:0045103) |  |  |  |  |  |
| intermediate filament cytoskeleton organization             | (GO:0045104) |  |  |  |  |  |
| intermediate filament organization                          | (GO:0045109) |  |  |  |  |  |
| intermediate filament bundle assembly                       | (GO:0045110) |  |  |  |  |  |
