# Supplementary material for: Insights for disease modeling from single-cell transcriptomics of iPSC-derived Ngn2-induced neurons and astrocytes across differentiation time and co-culture
Source: PubMed Central journal article supplement (PMC10985965; doi:10.1186/s12915-024-01867-4), 2024-04-02
Supplement: 12915_2024_1867_MOESM10_ESM.pdf [file 12915_2024_1867_MOESM10_ESM.pdf]

|                                                 |              | A-I | A-II | A-III |
|-------------------------------------------------|--------------|-----|------|-------|
| anatomical structure development                | (GO:0048856) |     |      |       |
| anatomical structure morphogenesis              | (GO:0009653) |     |      |       |
| biological_process                              | (GO:0008150) |     |      |       |
| cell adhesion                                   | (GO:0007155) |     |      |       |
| cell differentiation                            | (GO:0030154) |     |      |       |
| cell morphogenesis involved in differentiation  | (GO:0000904) |     |      |       |
| cellular developmental process                  | (GO:0048869) |     |      |       |
| cellular process                                | (GO:0009987) |     |      |       |
| developmental process                           | (GO:0032502) |     |      |       |
| external encapsulating structure organization   | (GO:0045229) |     |      |       |
| extracellular matrix organization               | (GO:0030198) |     |      |       |
| extracellular structure organization            | (GO:0043062) |     |      |       |
| multicellular organism development              | (GO:0007275) |     |      |       |
| multicellular organismal process                | (GO:0032501) |     |      |       |
| neuron development                              | (GO:0048666) |     |      |       |
| neuron differentiation                          | (GO:0030182) |     |      |       |
| regulation of cell communication                | (GO:0010646) |     |      |       |
| regulation of signal transduction               | (GO:0009966) |     |      |       |
| regulation of signaling                         | (GO:0023051) |     |      |       |
| system development                              | (GO:0048731) |     |      |       |
| aerobic electron transport chain                | (GO:0019646) |     |      |       |
| aerobic respiration                             | (GO:0009060) |     |      |       |
| ATP biosynthetic process                        | (GO:0006754) |     |      |       |
| cell-cell adhesion                              | (GO:0098609) |     |      |       |
| cellular respiration                            | (GO:0045333) |     |      |       |
| cytoplasmic translation                         | (GO:0002181) |     |      |       |
| generation of precursor metabolites and energy  | (GO:0006091) |     |      |       |
| organonitrogen compound biosynthetic process    | (GO:1901566) |     |      |       |
| oxidative phosphorylation                       | (GO:0006119) |     |      |       |
| proton motive force-driven ATP synthesis        | (GO:0015986) |     |      |       |
| regulation of intracellular signal transduction | (GO:1902531) |     |      |       |
| response to chemical                            | (GO:0042221) |     |      |       |
| response to endogenous stimulus                 | (GO:0009719) |     |      |       |
| actin cytoskeleton organization                 | (GO:0030036) |     |      |       |
| actin filament organization                     | (GO:0007015) |     |      |       |
| actin filament-based process                    | (GO:0030029) |     |      |       |
| cell development                                | (GO:0048468) |     |      |       |
| cell morphogenesis                              | (GO:0000902) |     |      |       |
| generation of neurons                           | (GO:0048699) |     |      |       |
| nervous system development                      | (GO:0007399) |     |      |       |
| neurogenesis                                    | (GO:0022008) |     |      |       |
| neuron projection development                   | (GO:0031175) |     |      |       |
| regulation of developmental process             | (GO:0050793) |     |      |       |
| supramolecular fiber organization               | (GO:0097435) |     |      |       |
