# Supplementary material for: Insights for disease modeling from single-cell transcriptomics of iPSC-derived Ngn2-induced neurons and astrocytes across differentiation time and co-culture
Source: PubMed Central journal article supplement (PMC10985965; doi:10.1186/s12915-024-01867-4), 2024-04-02

# GO term Enrichments – up in A0 vs AN21

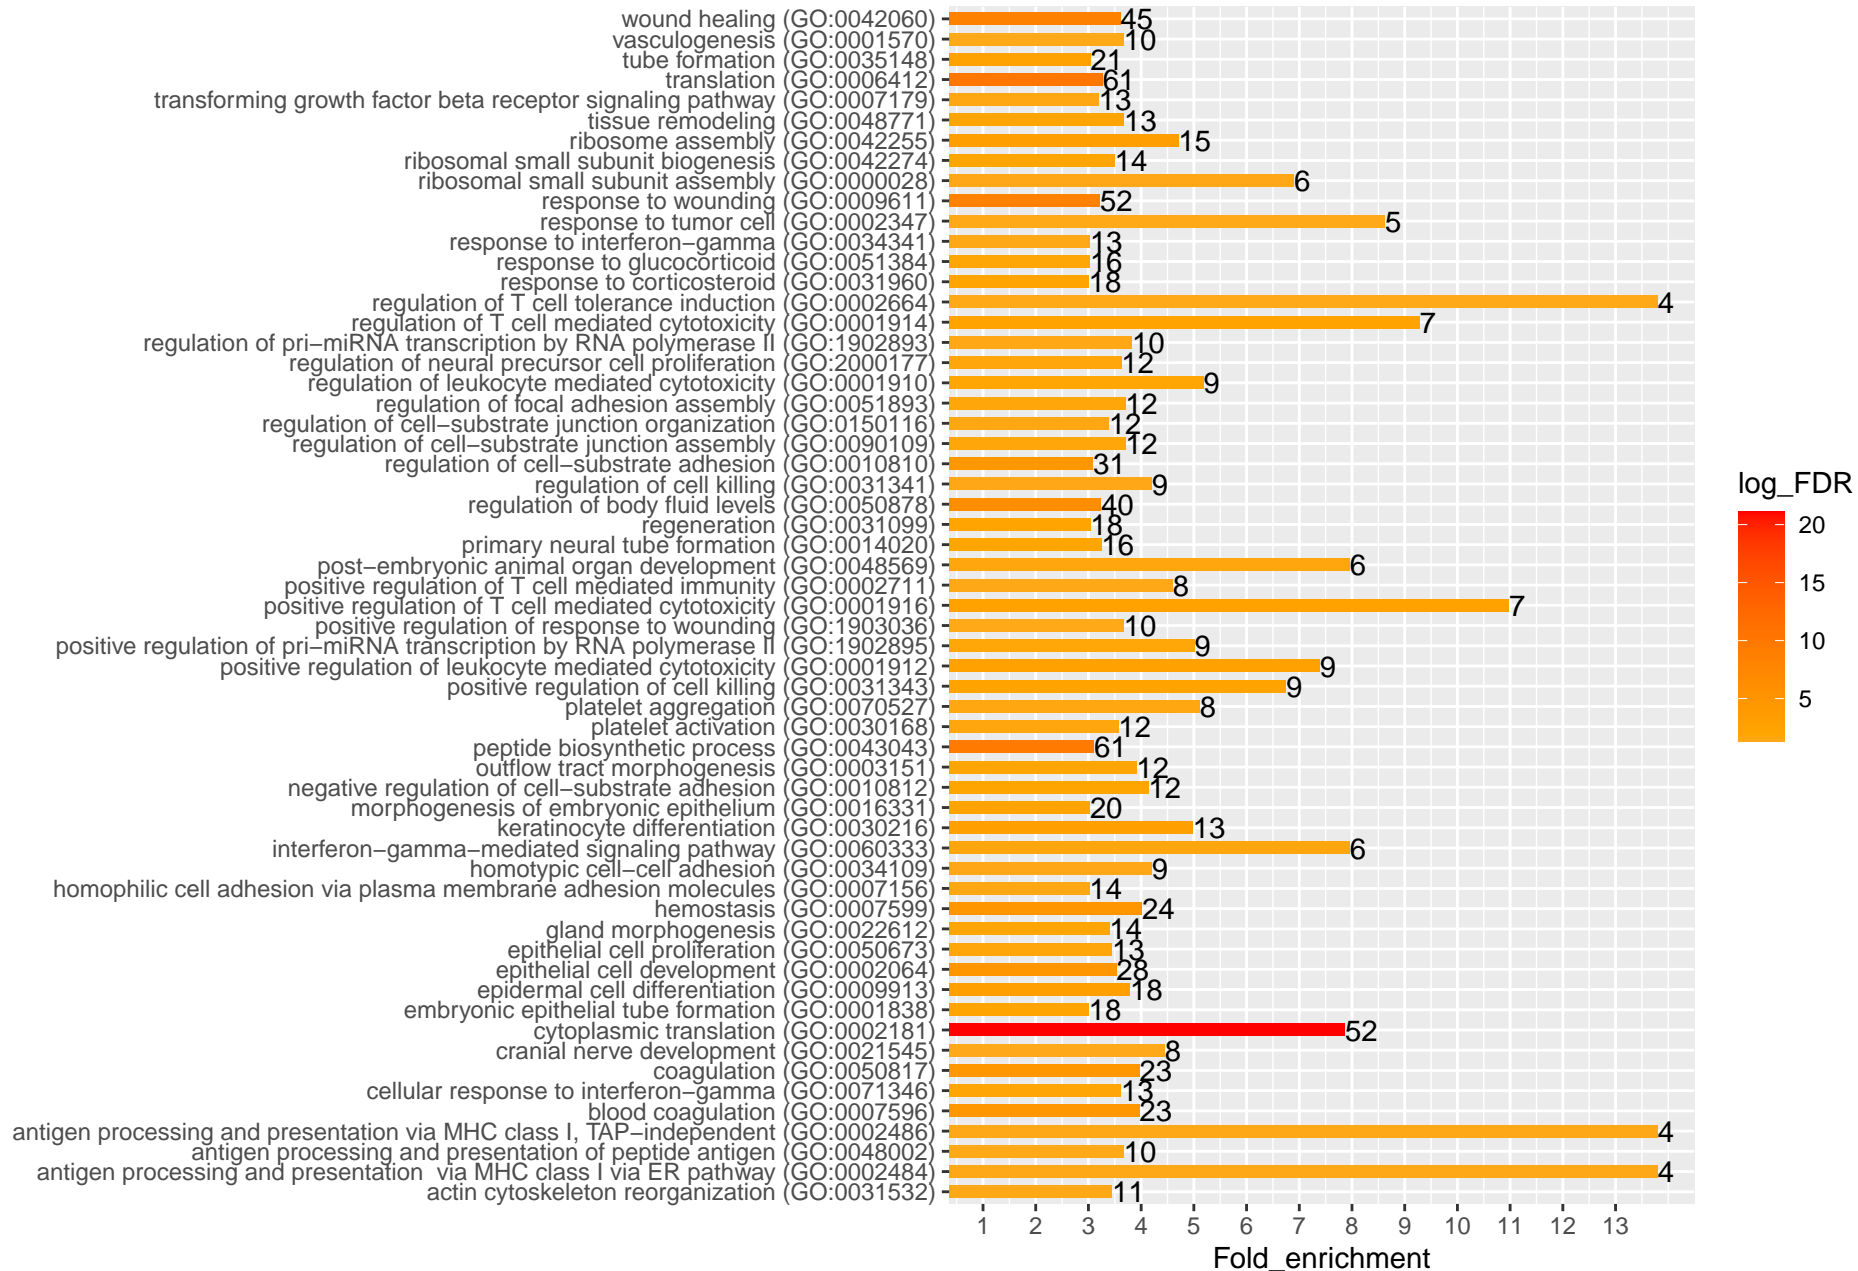

Supplement: 12915_2024_1867_MOESM22_ESM.pdf [file 12915_2024_1867_MOESM22_ESM.pdf]
