# Supplementary material for: Insights for disease modeling from single-cell transcriptomics of iPSC-derived Ngn2-induced neurons and astrocytes across differentiation time and co-culture
Source: PubMed Central journal article supplement (PMC10985965; doi:10.1186/s12915-024-01867-4), 2024-04-02
Supplement: 12915_2024_1867_MOESM23_ESM.pdf [file 12915_2024_1867_MOESM23_ESM.pdf]

**A**

Zhang et al 2014

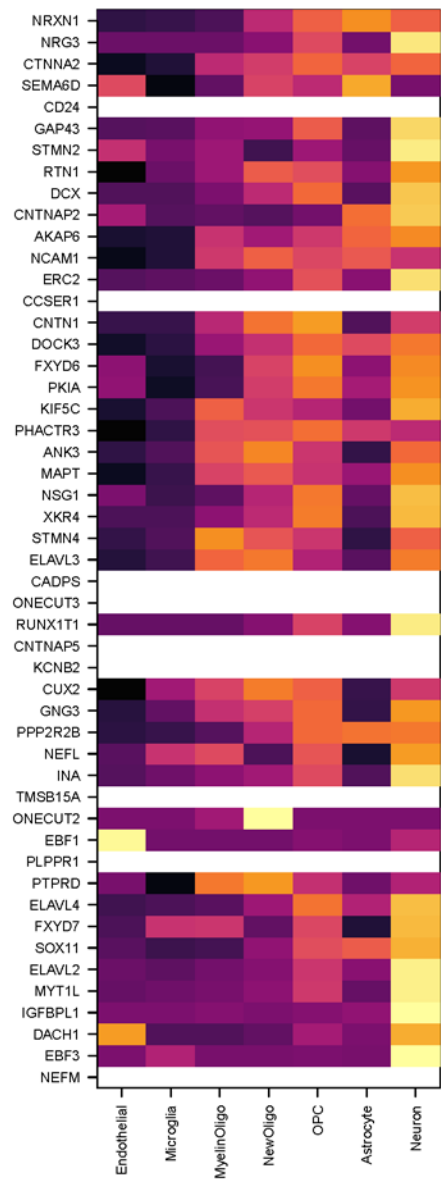

Darmanis et al 2015

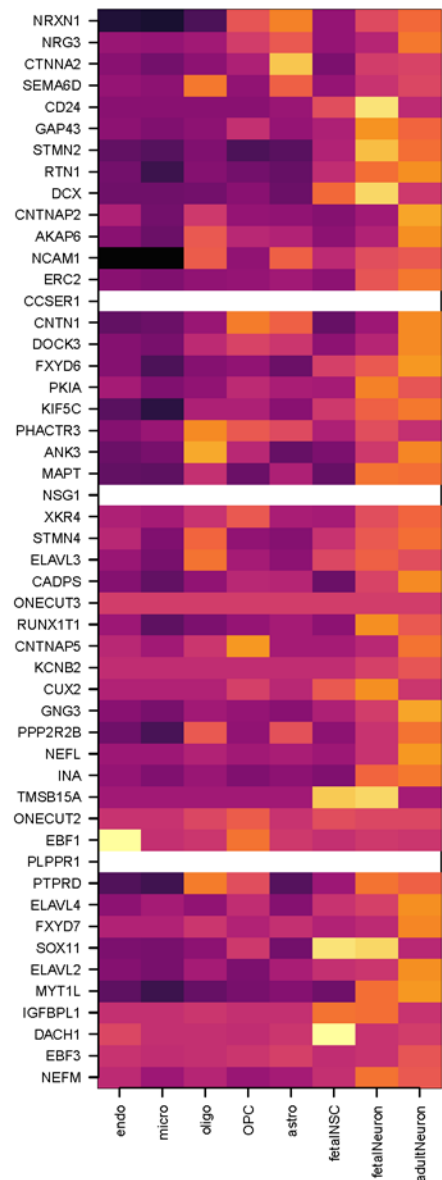

This report: DEG.AvN.Nup

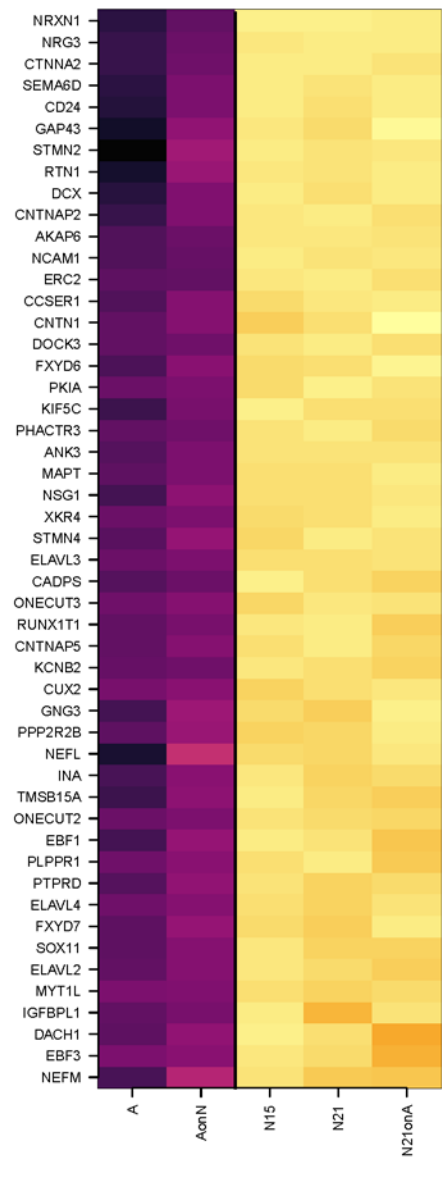

Burke et al 2020

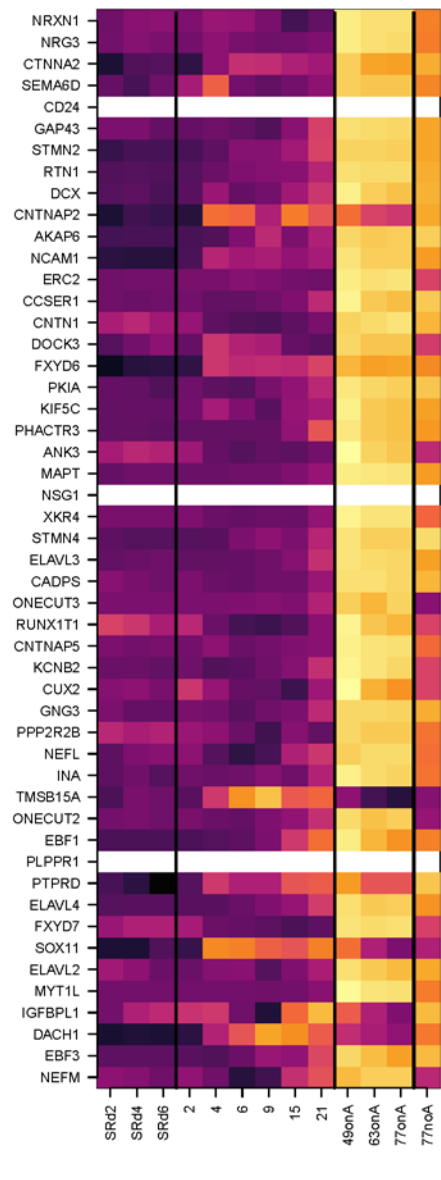

Molyneux et al 2015 (DeCon)

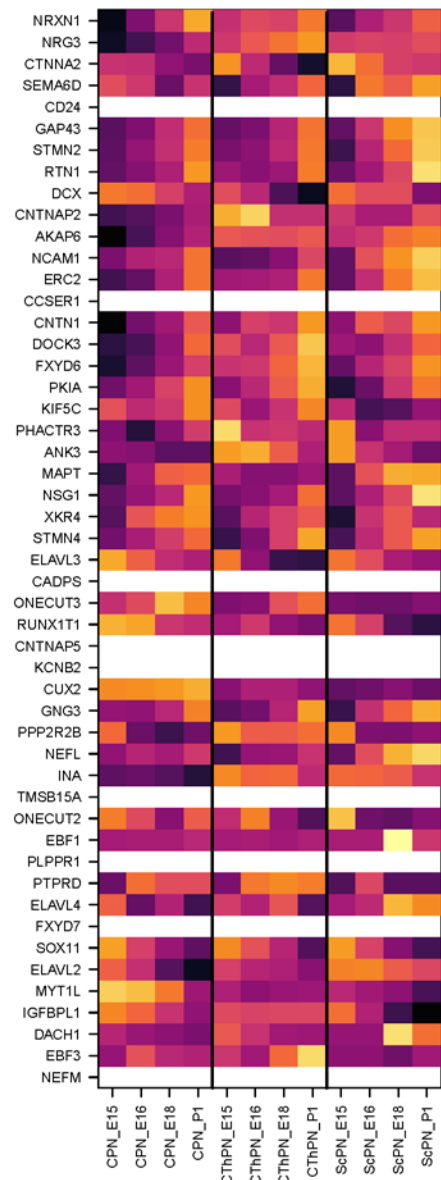

Expression Z-scores

Expression Z-scores

Expression Z-scores

Expression Z-scores

Expression Z-scores

**B**

Zhang et al 2014

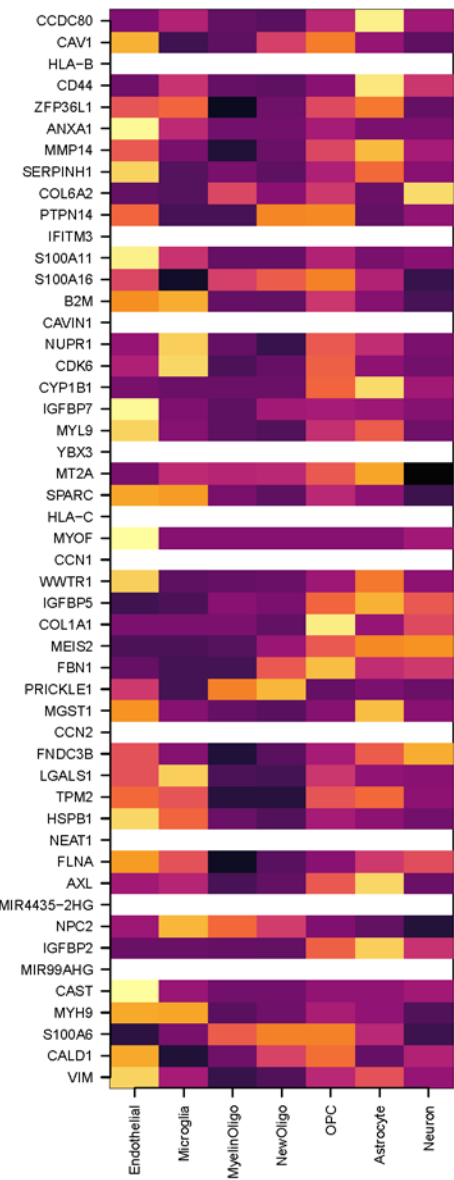

Darmanis et al 2015

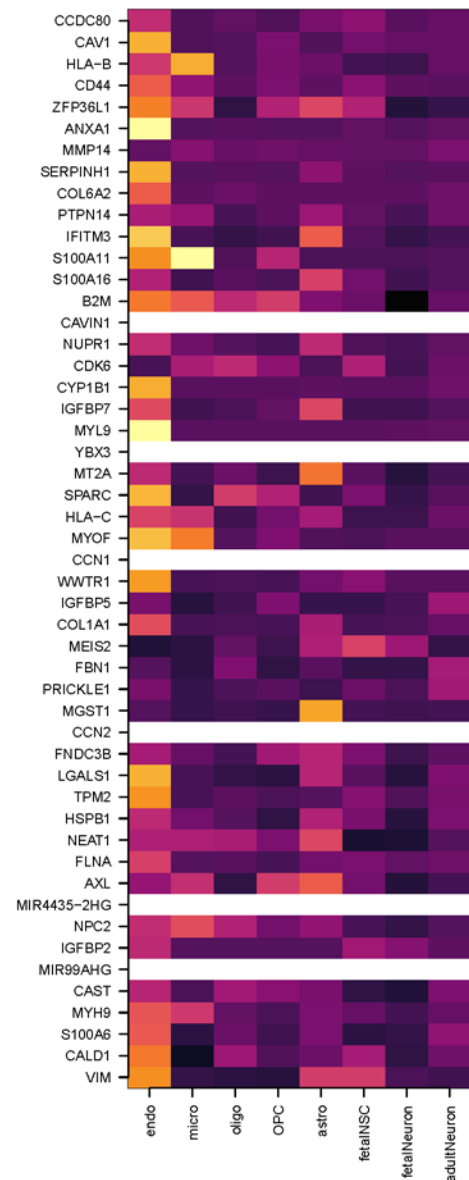

This report: DEG.AvN.Aup

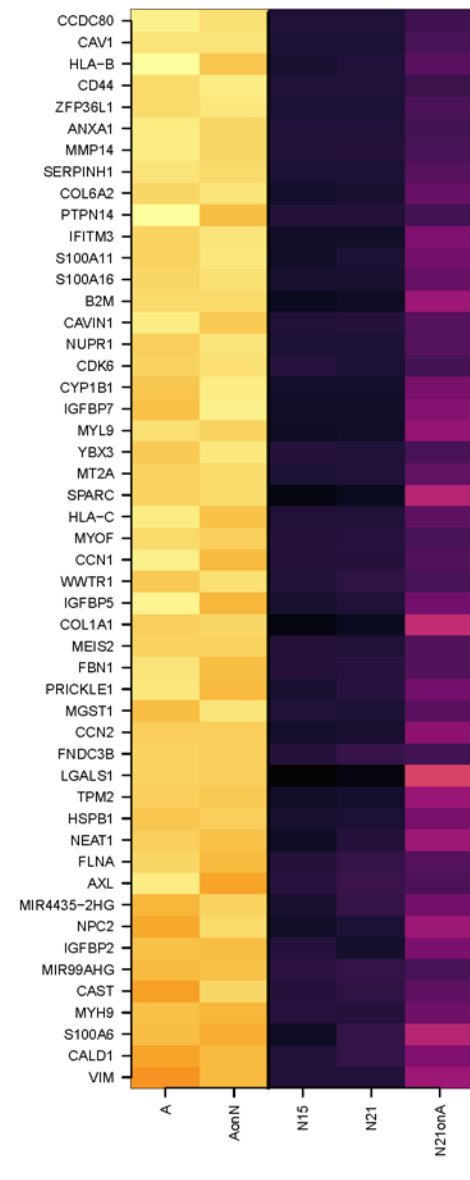

Burke et al 2020

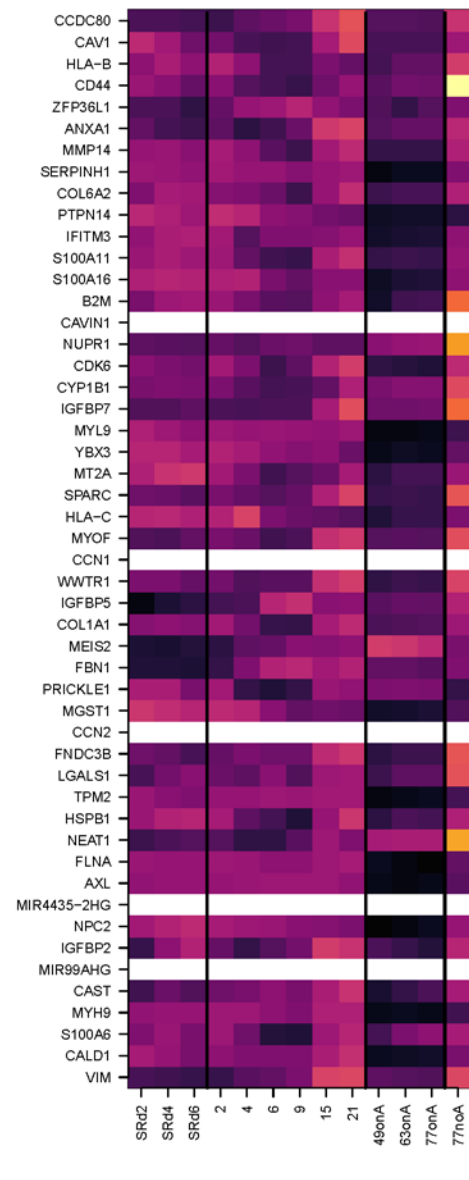

Molyneux et al 2015 (DeCon)

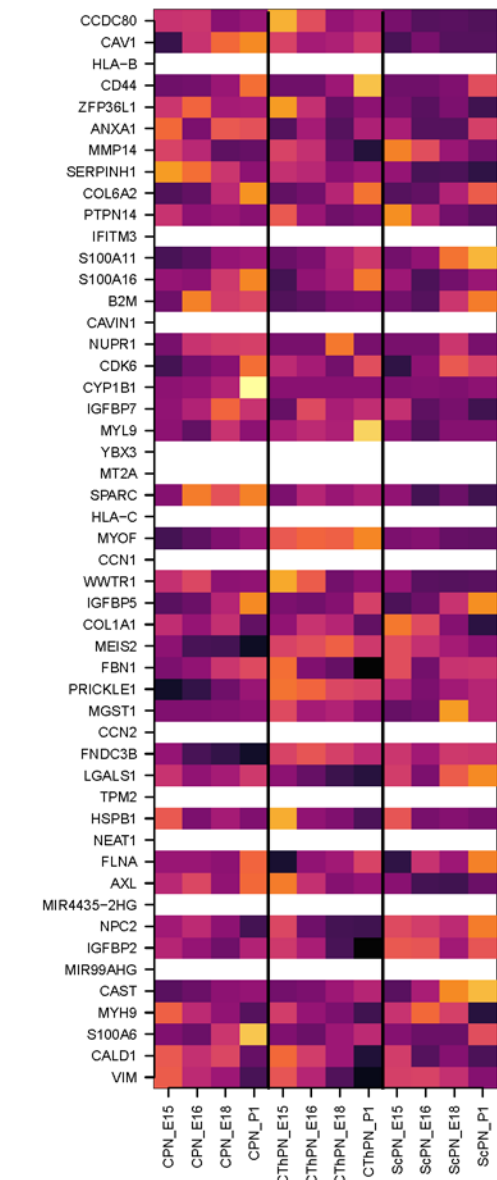

Expression Z-scores

-1.8

2.26

Expression Z-scores

-1.05

2.77

Expression Z-scores

-0.84

1.62

Expression Z-scores

-1.84

4.34

Expression Z-scores

-2.21

3.18

**C**

Zhang et al 2014

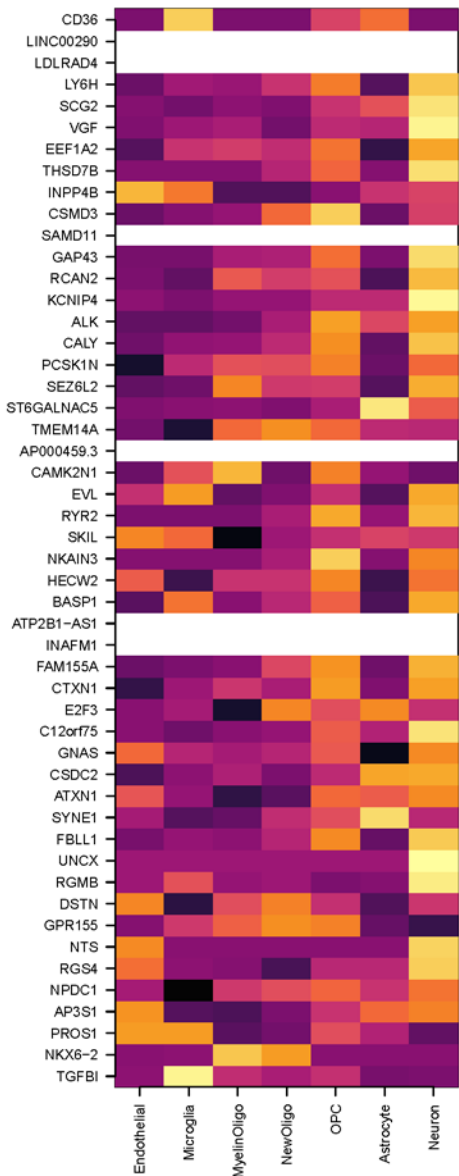

Darmanis et al 2015

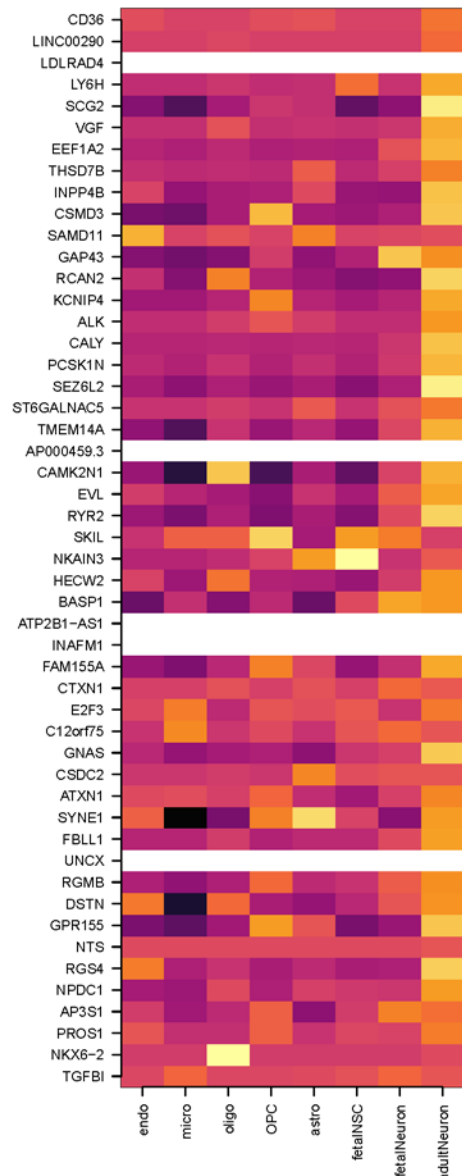

This report: DEG.NvNA.NAup

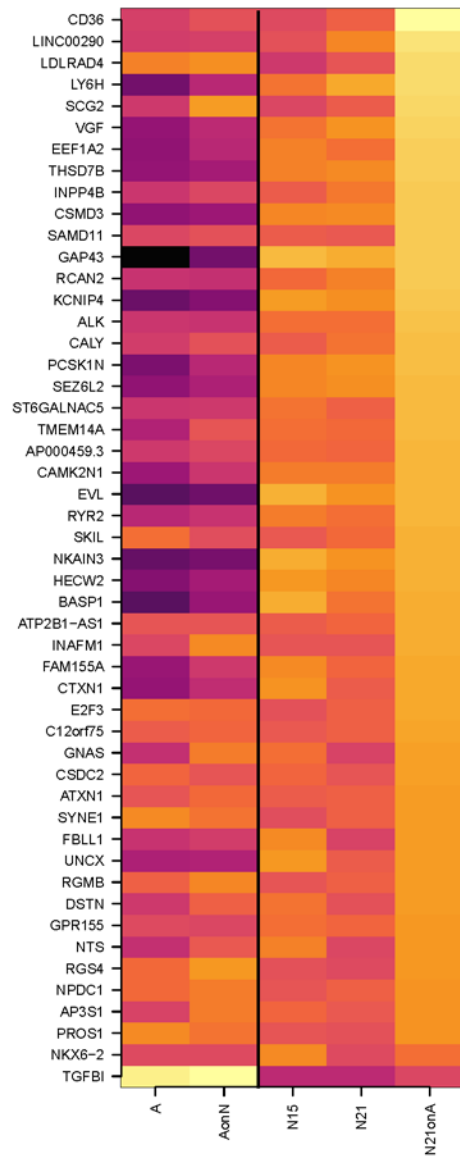

Burke et al 2020

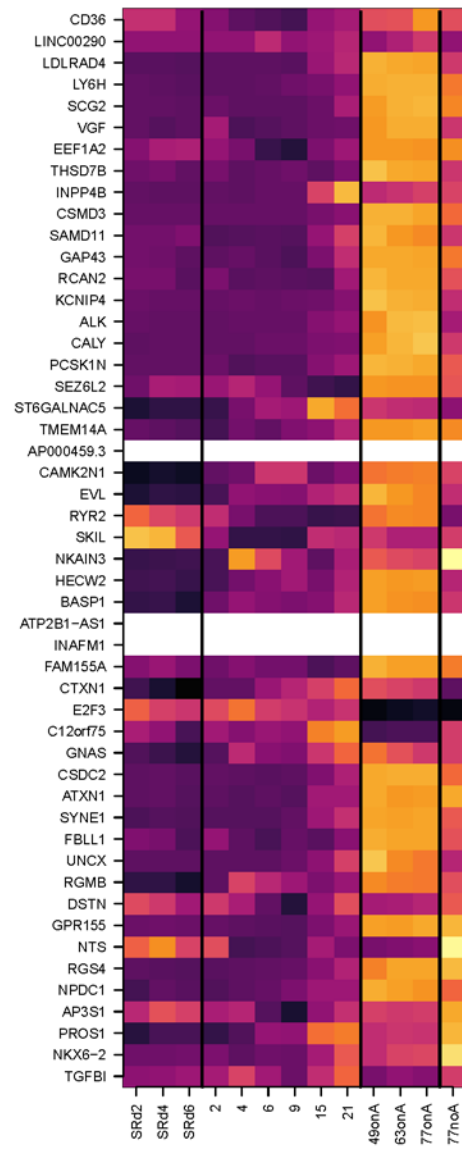

Molyneux et al 2015 (DeCon)

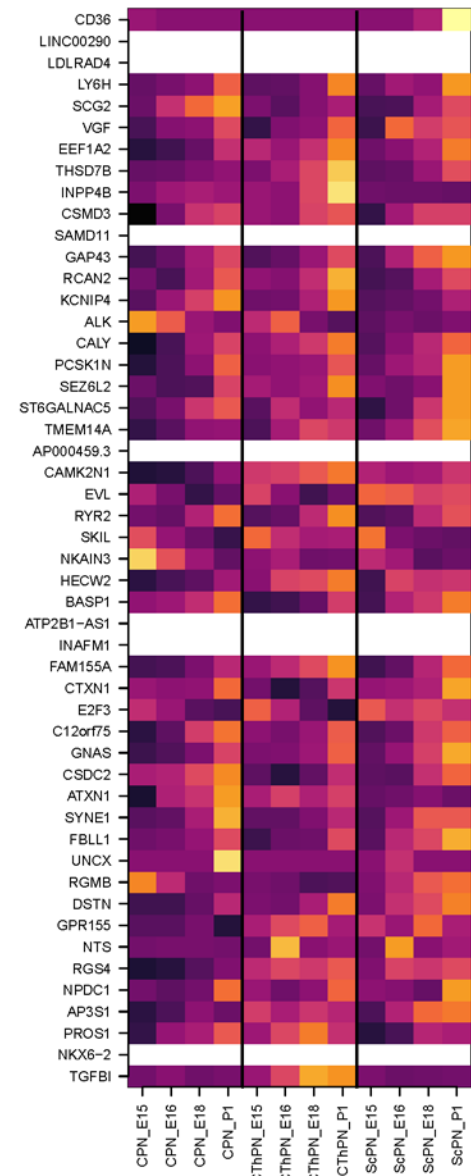

Expression Z-scores

Expression Z-scores

Expression Z-scores

Expression Z-scores

Expression Z-scores

**D**

Zhang et al 2014

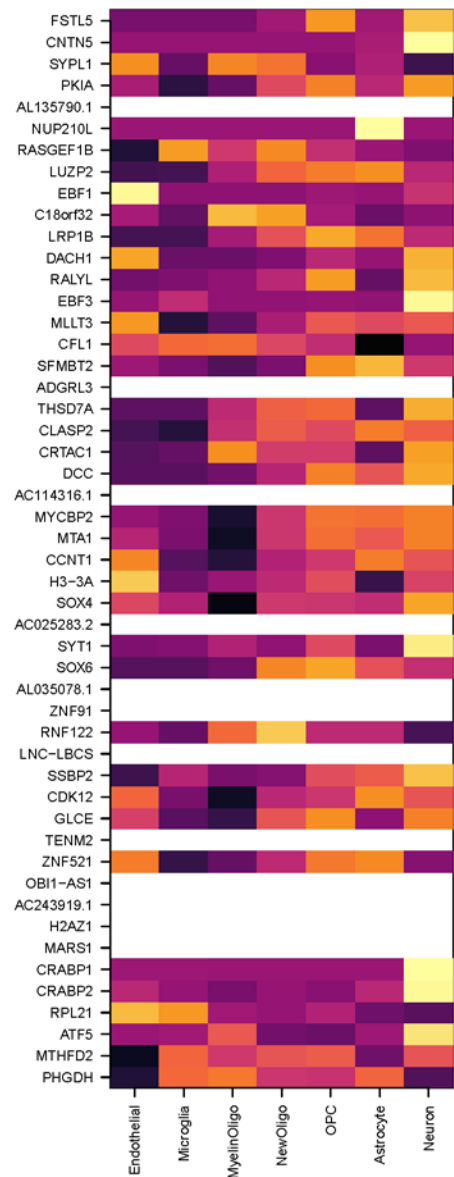

Expression Z-scores

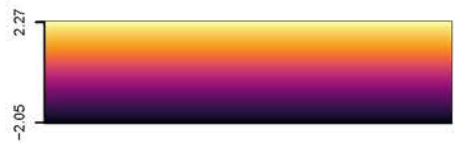

Darmanis et al 2015

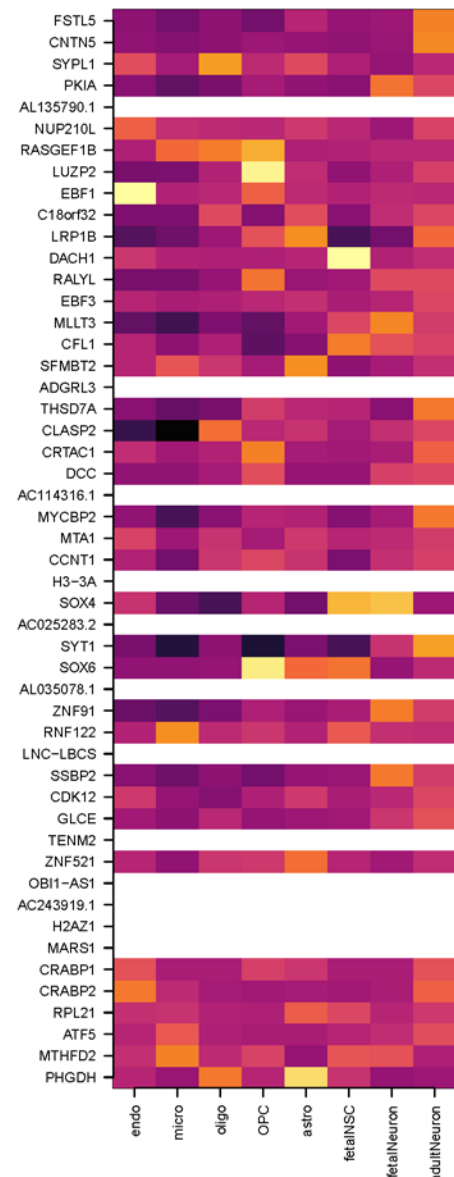

Expression Z-scores

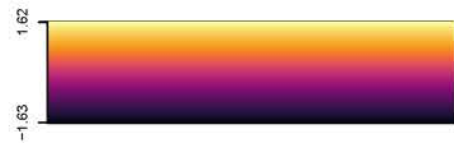

This report: DEG.NvNA.Nup

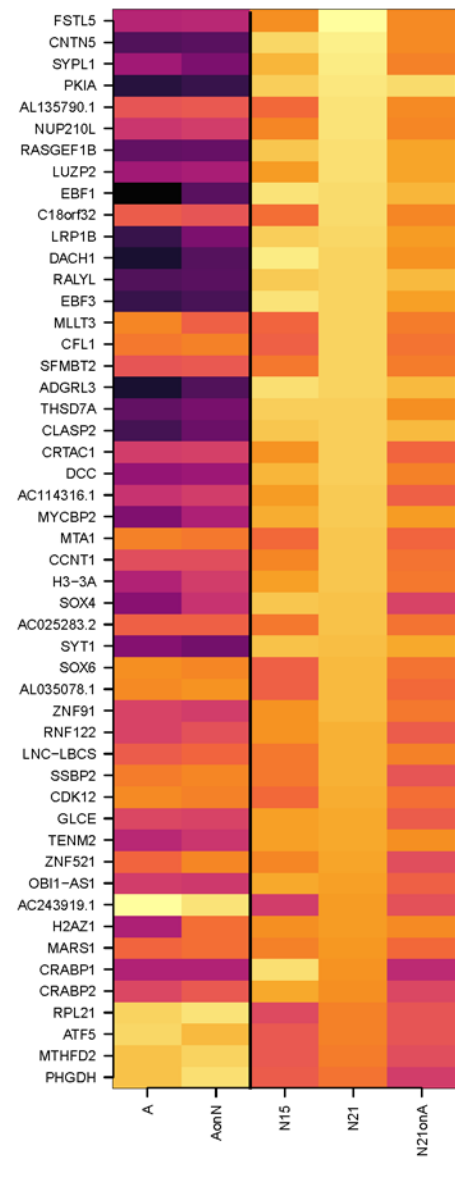

Expression Z-scores

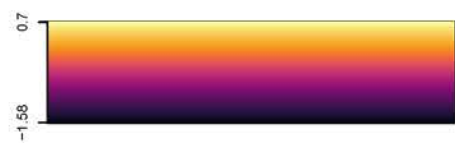

Burke et al 2020

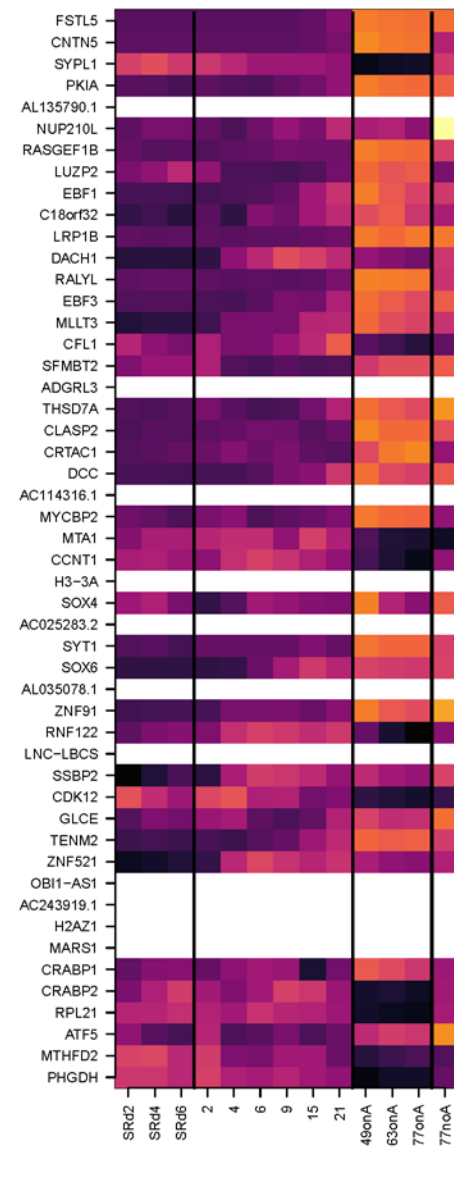

Expression Z-scores

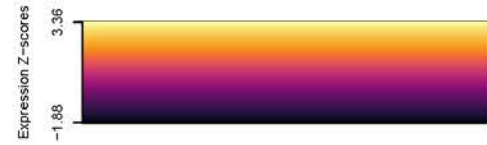

Molyneux et al 2015 (DeCon)

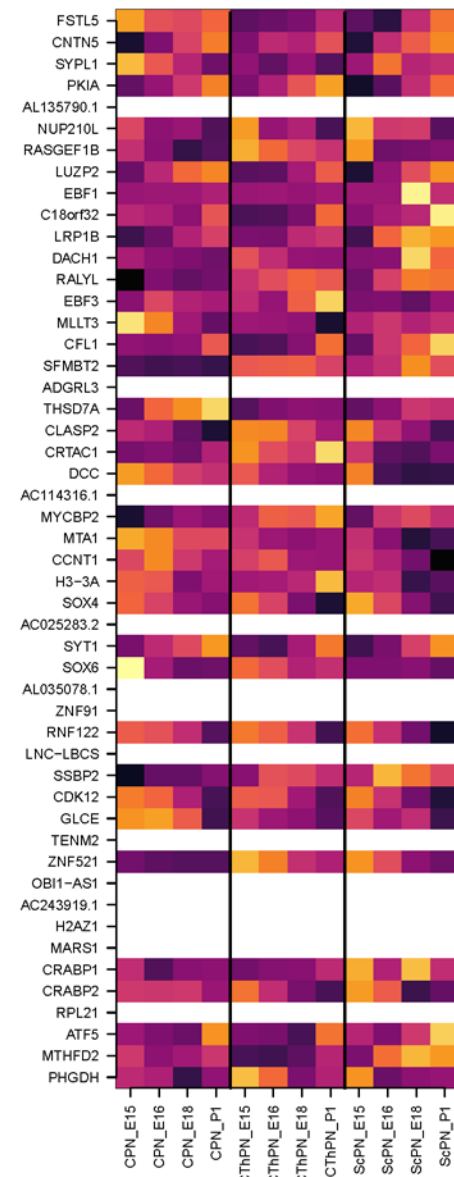

Expression Z-scores

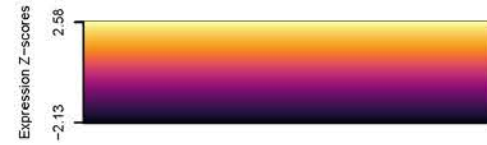

**E**

Zhang et al 2014

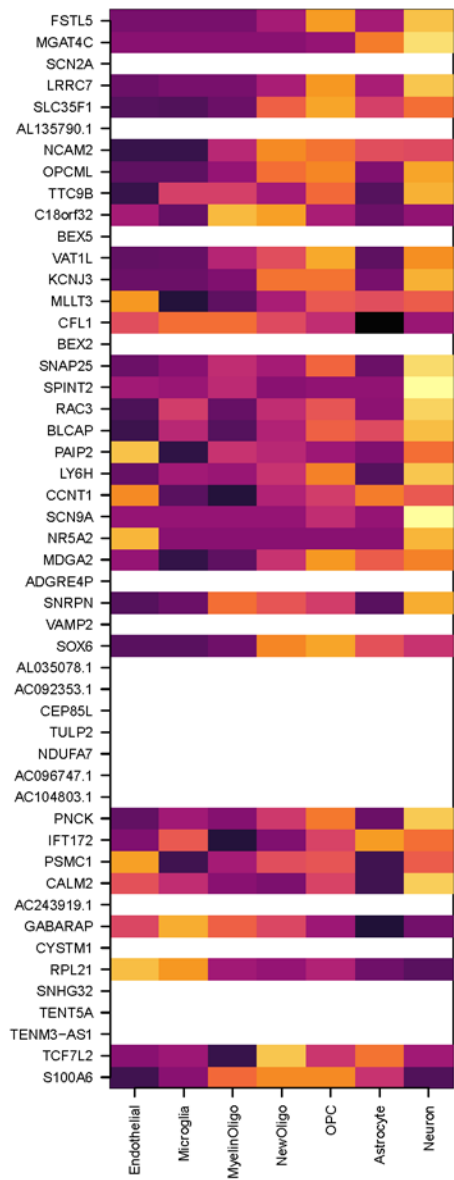

Darmanis et al 2015

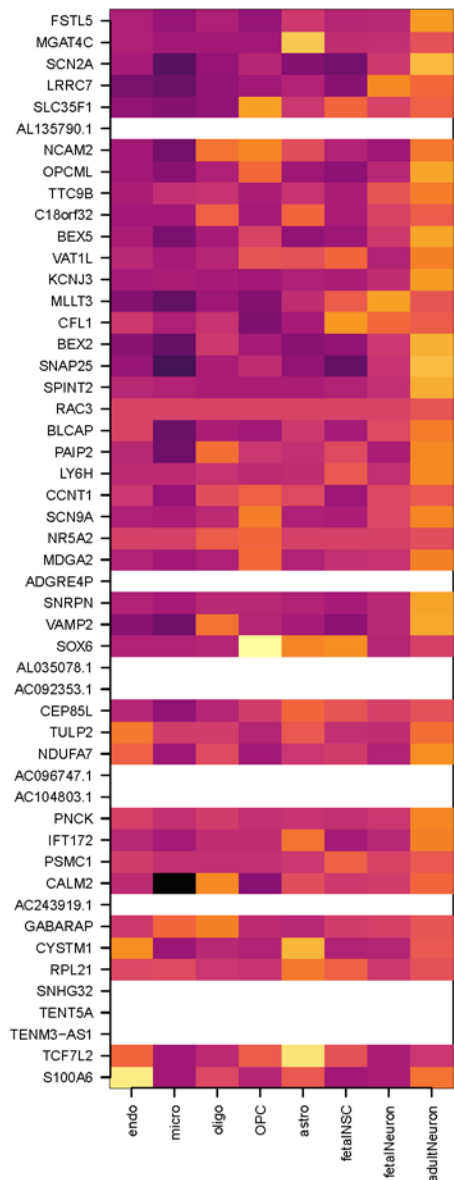

This report: DEG.N15vN21.21up

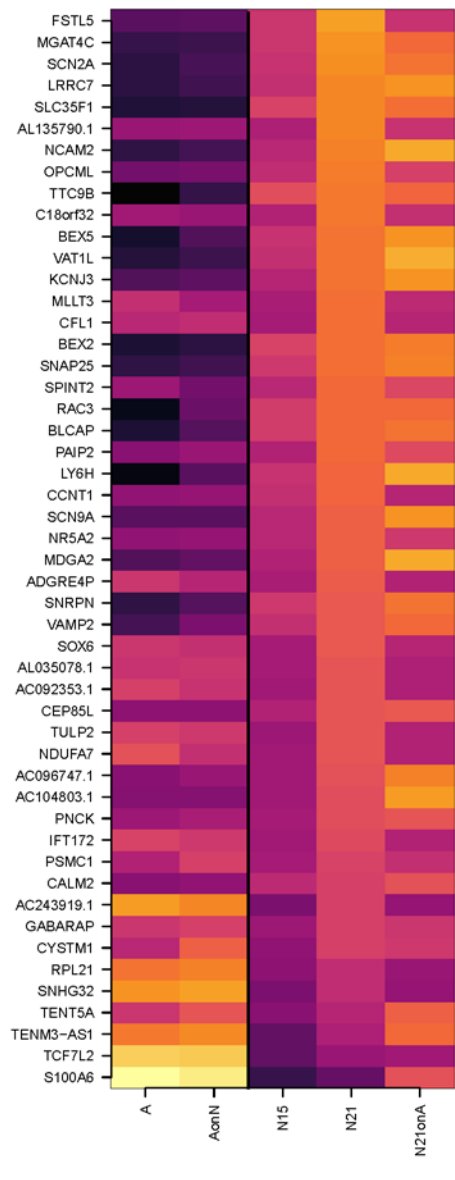

Burke et al 2020

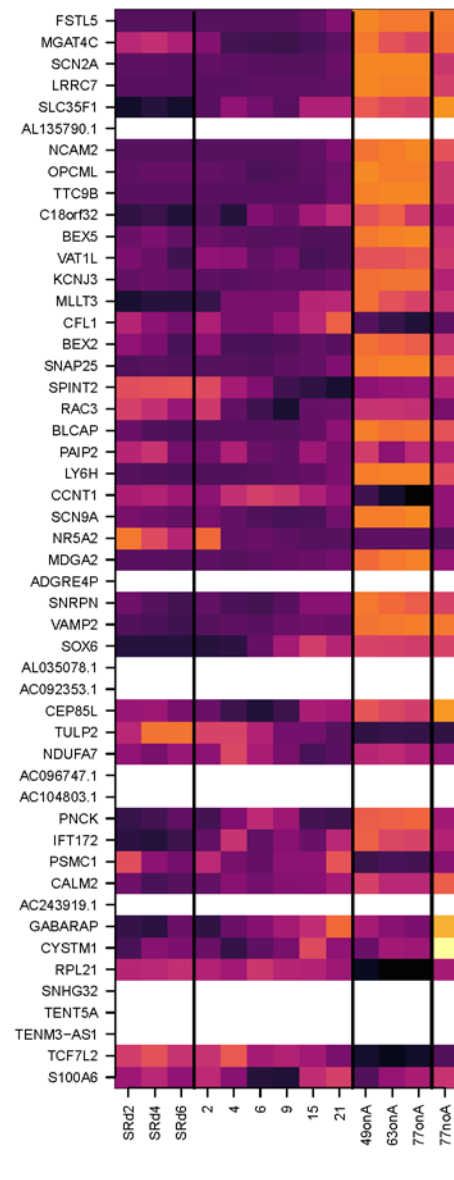

Molyneux et al 2015 (DeCon)

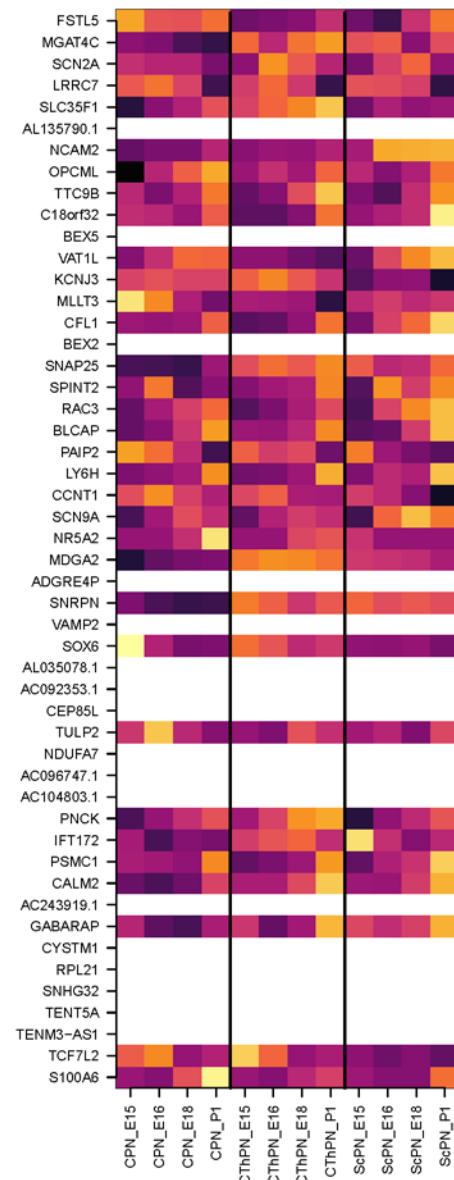

Expression Z-scores

Expression Z-scores

Expression Z-scores

Expression Z-scores

Expression Z-scores

**F**

Zhang et al 2014

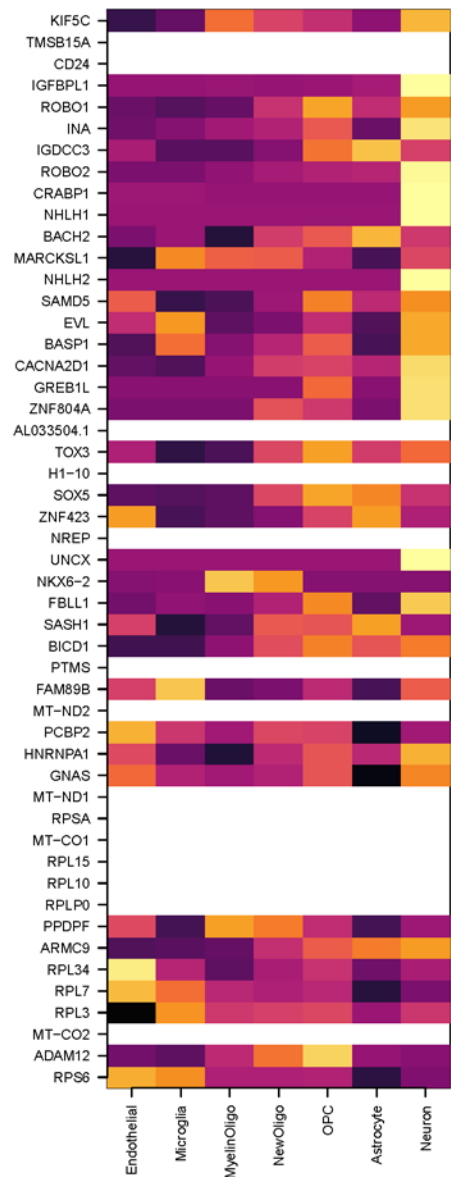

Darmanis et al 2015

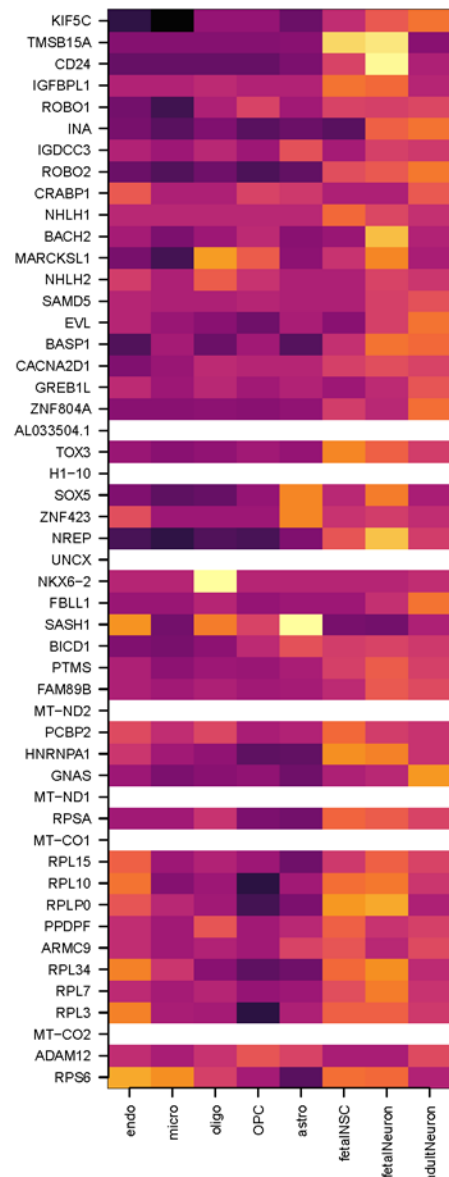

This report: DEG.N15vN21.15up

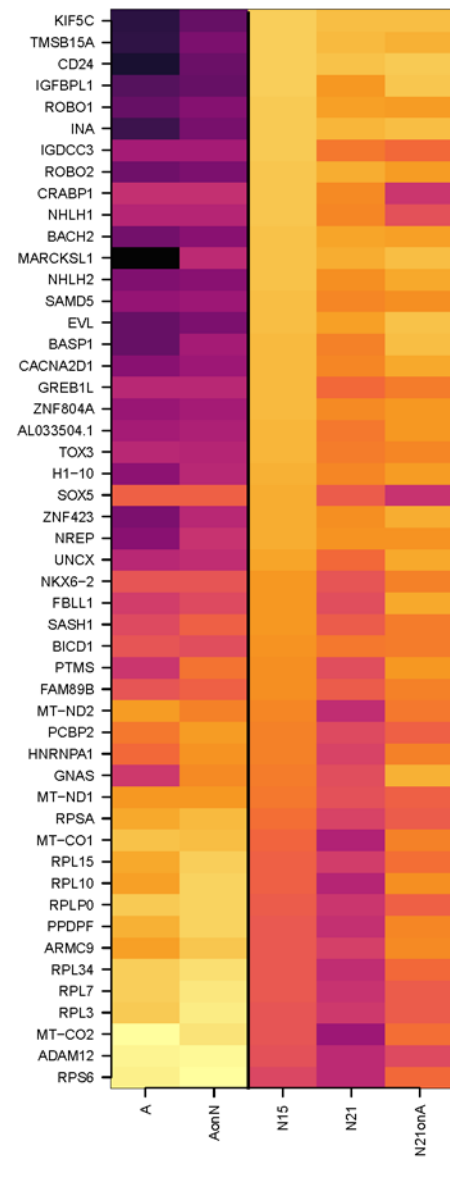

Burke et al 2020

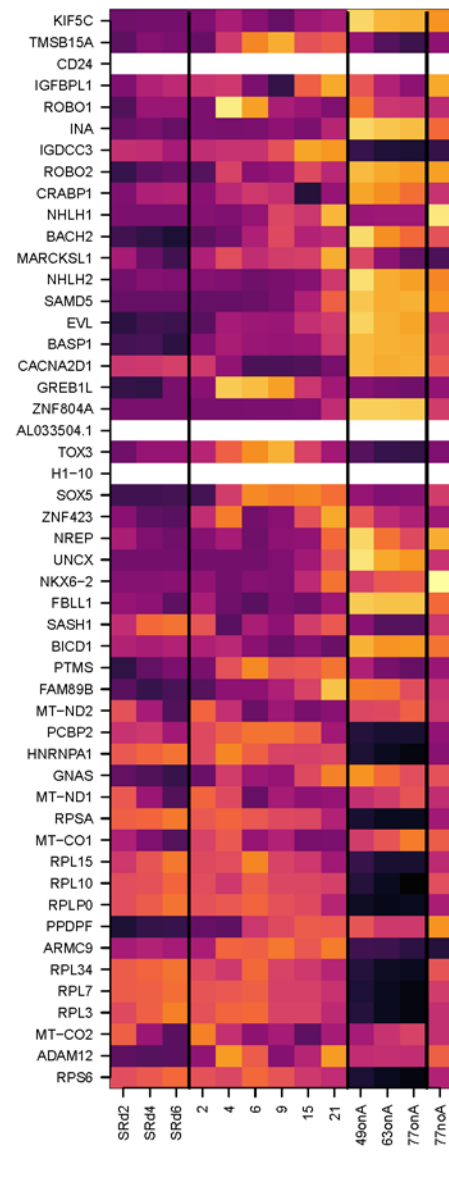

Molyneux et al 2015 (DeCon)

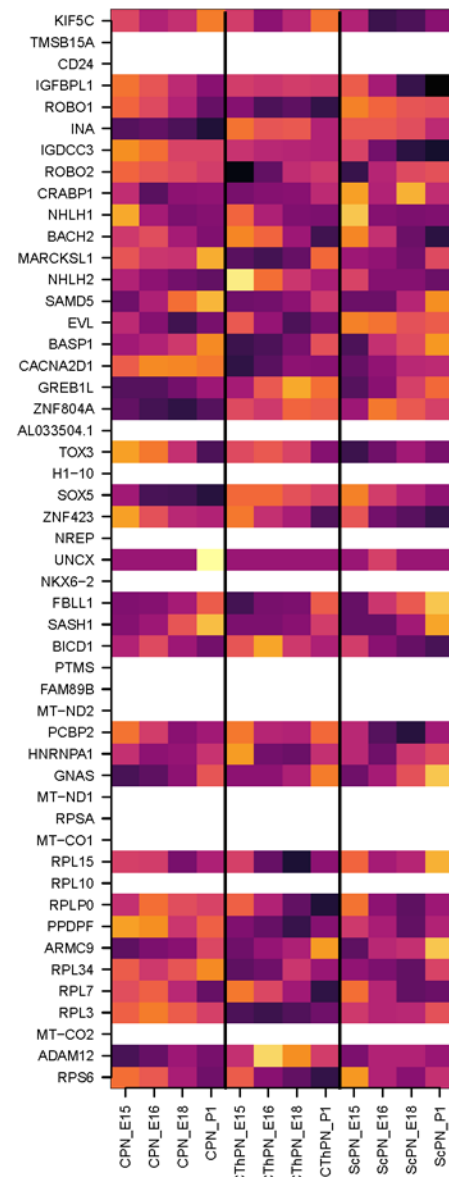

Expression Z-scores

Expression Z-scores

Expression Z-scores

Expression Z-scores

Expression Z-scores

**G**

Zhang et al 2014

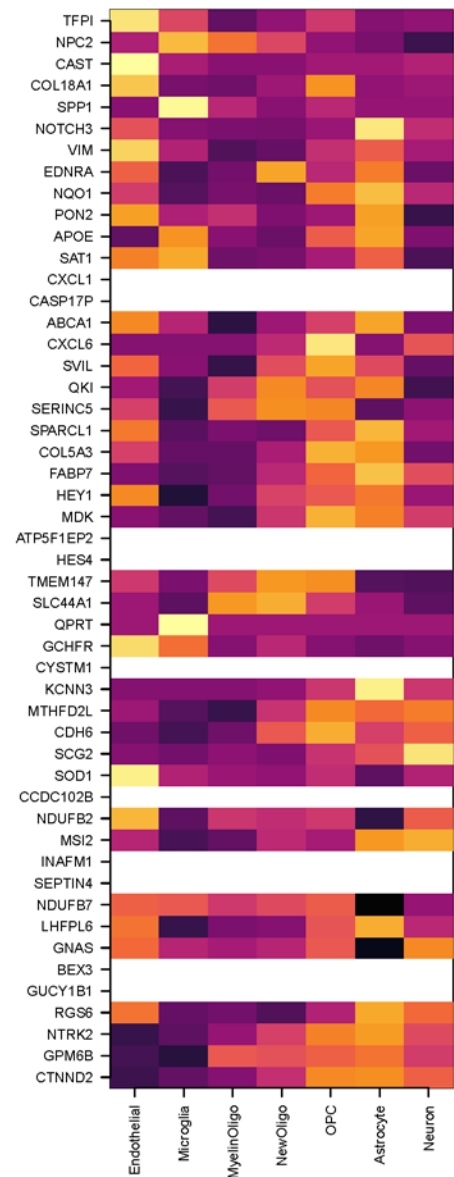

Expression Z-scores

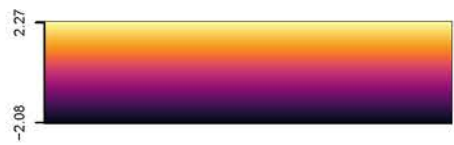

Darmanis et al 2015

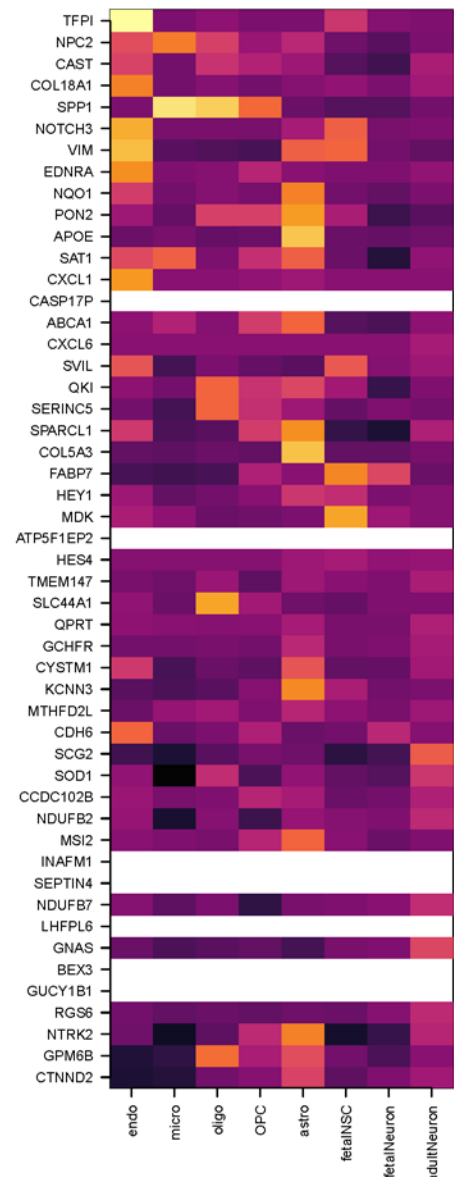

Expression Z-scores

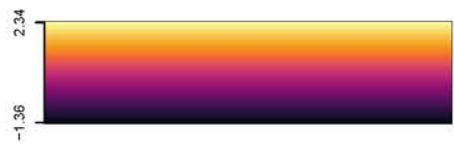

This report: DEG.AvAN.ANup

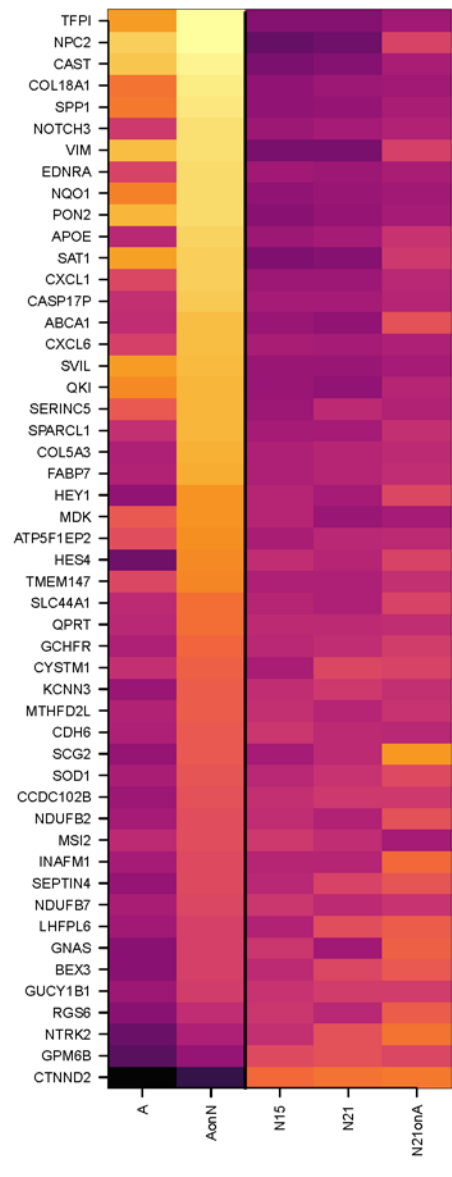

Expression Z-scores

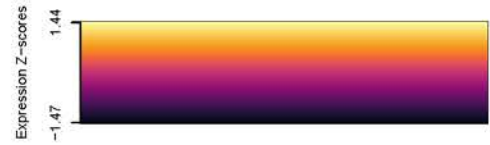

Burke et al 2020

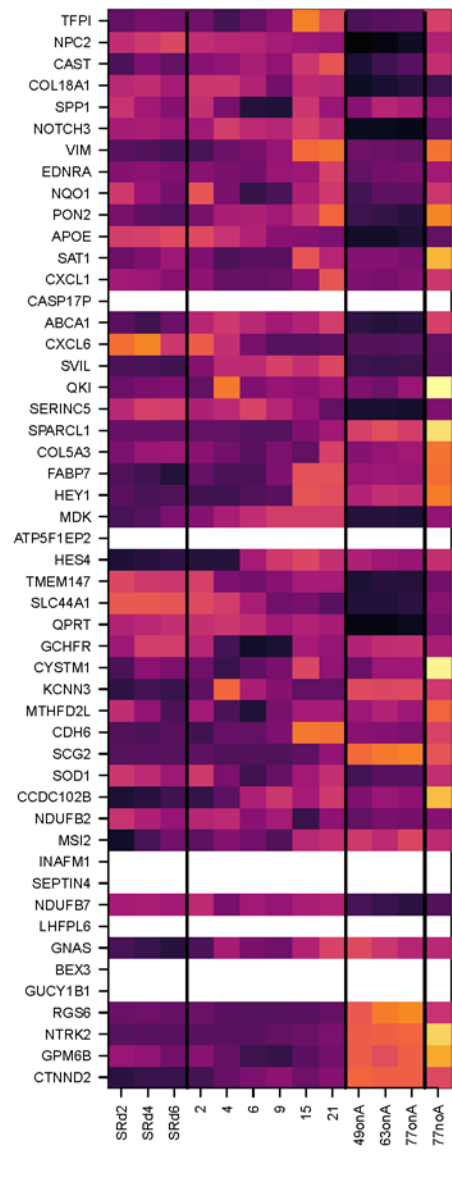

Expression Z-scores

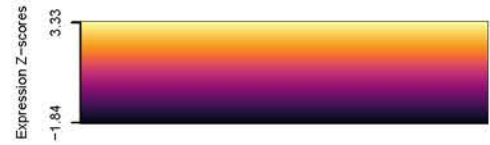

Molyneaux et al 2015 (DeCon)

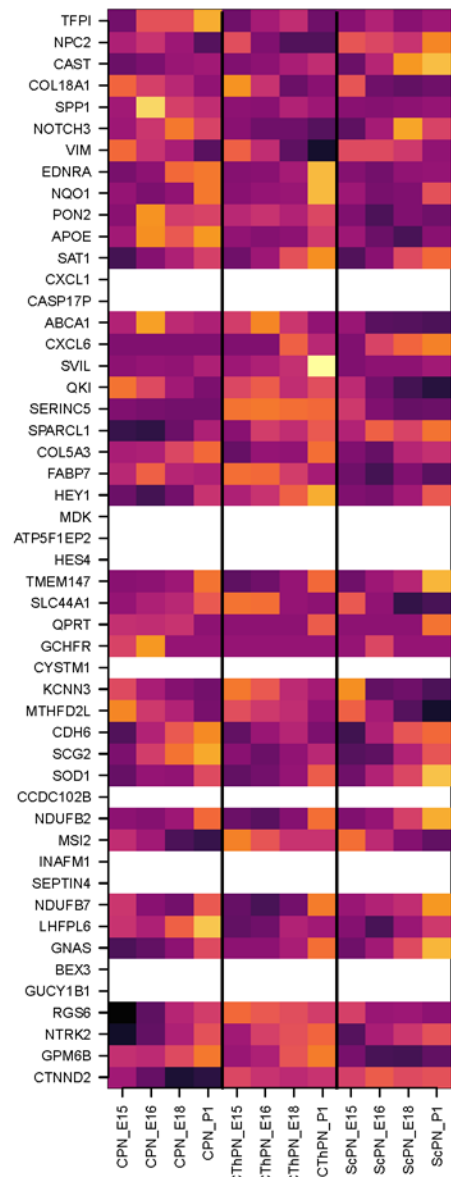

Expression Z-scores

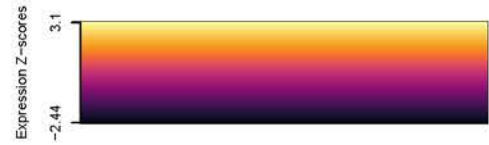

**H**

Zhang et al 2014

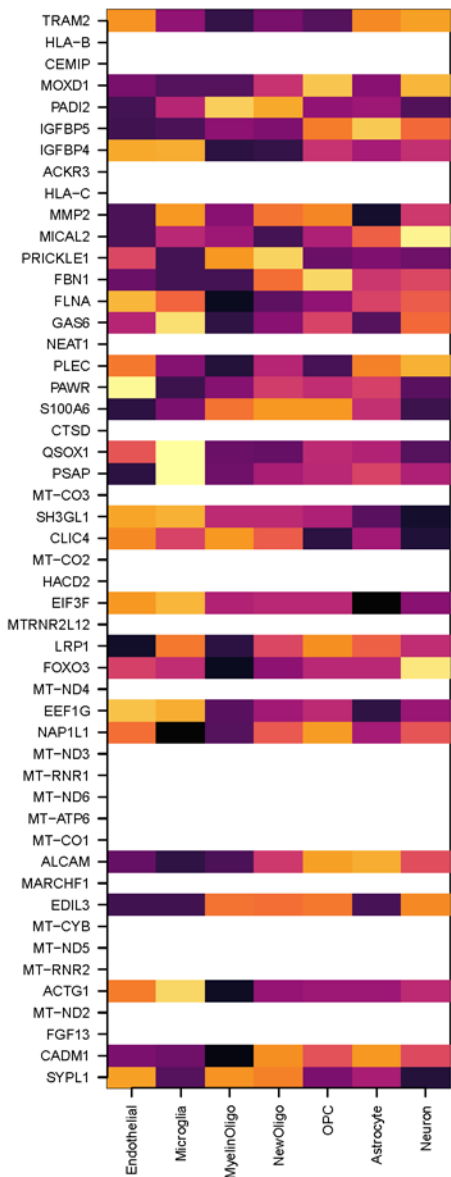

Expression Z-scores

-1.73

1.96

Darmanis et al 2015

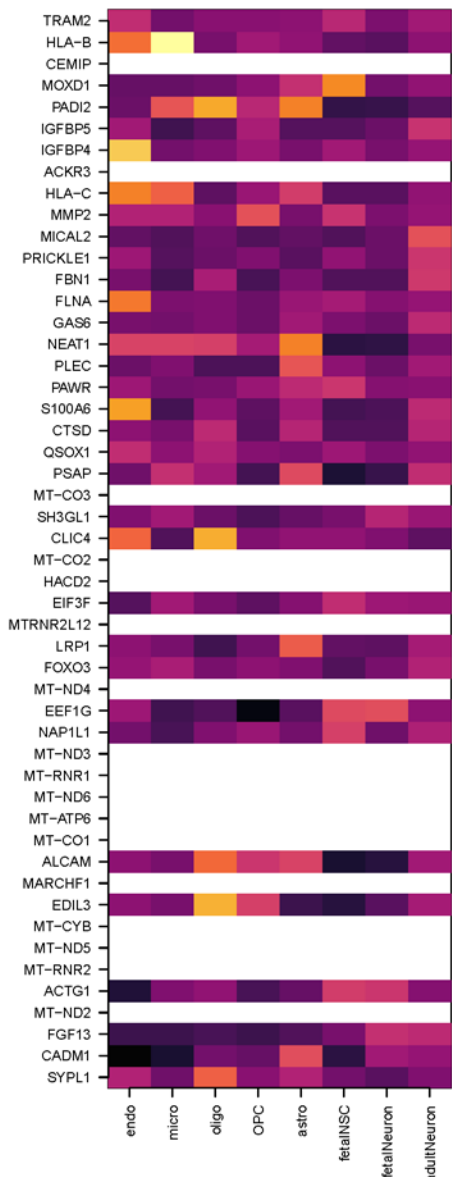

Expression Z-scores

-1.18

2.04

This report: DEG.AvAN.Aup

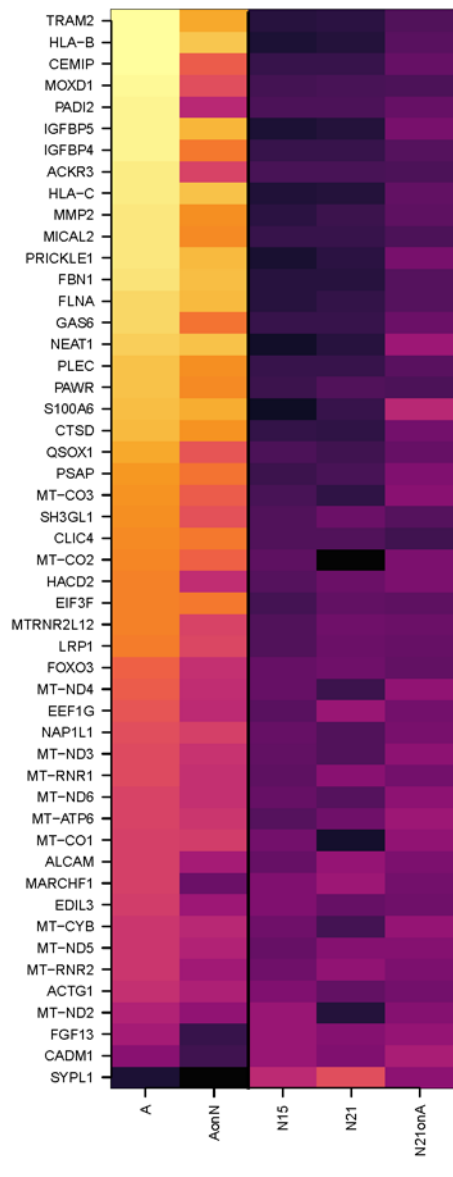

Expression Z-scores

-0.85

1.62

Burke et al 2020

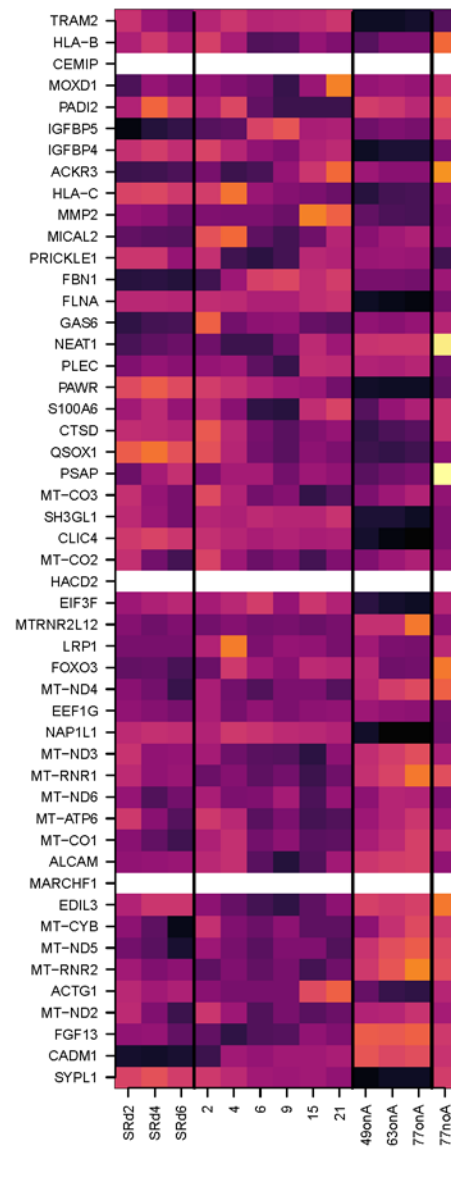

Expression Z-scores

-1.84

3.24

Molyneux et al 2015 (DeCon)

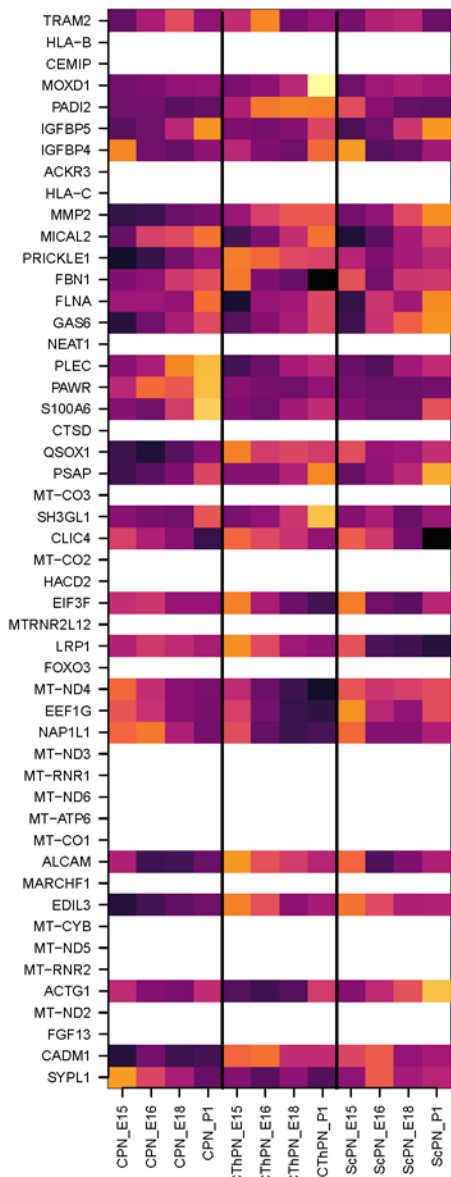

Expression Z-scores

-2.19

3.04
